# Supplementary figures and images for: Chromosome Asynapsis Is the Main Cause of Male Sterility in the Interspecies Hybrids of East Asian Voles (Alexandromys, Rodentia, Arvicolinae)
Source: MDPI journal article supplement (doi:10.3390/genes14051022), 2023-04-30

**A**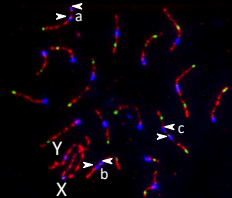**B**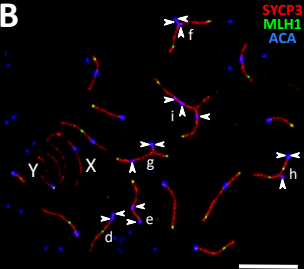

Supplement: s1 [file s1]

**SYCP3**  
**MLH1**  
**ACA**

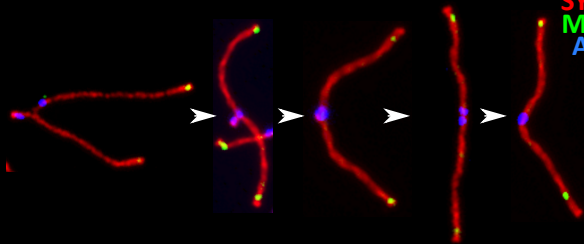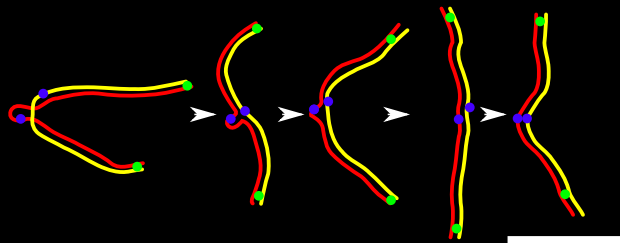

Supplement: s1 [file s1]
